# Supplementary material for: Reducing nitrogen crossover in microbial reverse-electrodialysis cells by using adjacent anion exchange membranes and anion exchange resin
Source: Royal Society of Chemistry journal article supplement (doi:10.1039/c5ew00160a), 2015-01-01
Supplement: c5ew00160a1.pdf [file c5ew00160a1.pdf]

Date: June 26, 2015  
Submitted to: *Environmental Science: Water Research & Technology*

Supporting Information for:  
  
Reducing nitrogen crossover in microbial reverse-electrodialysis cells by  
  
using ion exchange resin

Maxwell J. Wallack<sup>1</sup>, Geoffrey M. Geise<sup>2</sup>, Marta C. Hatzell<sup>3</sup>, Michael A. Hickner<sup>4</sup>  
and Bruce E. Logan<sup>1\*</sup>

<sup>1</sup>Department of Civil and Environmental Engineering, The Pennsylvania State University,  
University Park, Pennsylvania 16802, United States

<sup>2</sup>Department of Chemical Engineering, University of Virginia,  
Charlottesville, Virginia 22904, United States

<sup>3</sup>George W. Woodruff School of Mechanical Engineering, Georgia Institute of Technology,  
Atlanta, Georgia 30332, United States

<sup>4</sup>Department of Materials Science and Engineering, The Pennsylvania State University,  
University Park, Pennsylvania 16802, United States

\*Corresponding Author. Telephone: +1 814 863 7908. Fax: +1 814 863 7304.  
E-mail: bel3@engr.psu.edu

## Estimated Power Losses and Mitigation

The increased resistance due to the additional LC chamber and AEM will decrease the energy efficiency of an MREC. The extent of power loss can be estimated based on the increased resistance using an additional chamber and membrane. Based on net power equations for RED stacks<sup>1</sup>, the power loss ( $P_{loss}$ ) is:

$$P_{loss} = \frac{(R_{soln} + R_{mem})}{A_G} \cdot j^2 \quad (13)$$

where here  $j = 4$  mA,  $R_{soln} = 25 \Omega\text{-cm}^2$  due to the modified width (1.3 mm) LC chamber (section 5.2),  $R_{mem} = 192 \Omega\text{-cm}^2$  due to the additional AEM, and  $A_G = 6.55 \text{ cm}^2$ . The resistance due to the additional AEM was the difference between the membranes in the 3C reactor ( $295 \Omega\text{-cm}^2$ ) and 2C reactor ( $103 \Omega\text{-cm}^2$ ). This modified area-resistance took into consideration ohmic ( $R_{ohmic}$ ), bulk concentration change ( $R_{\Delta C}$ ), and boundary layer ( $R_{BL}$ ) resistances for the membranes. Power loss was 0.530 mW for the additional AEM and LC NaCl solution.

Power loss can be mitigated by introducing additional membranes to the RED stack. The number of membranes necessary to mitigate power loss from the solution and membrane resistances<sup>1</sup> is:

$$P_{net} = N_{pairs} E_{OCV} j - P_{loss} - \frac{N_{pairs} (R_{soln} + R_{mem}) j^2}{A_G} \quad (14)$$

where  $P_{net}$  is the net power (set at zero), and  $N_{pairs}$  the number of membrane pairs. Based on a current of  $j = 4$  mA,  $P_{loss} = 0.530$  mW,  $E_{OCV} = 0.156 \text{ V}$ <sup>2, 3</sup> for one membrane pair (one AEM and one CEM),  $R_{mem} = 140 \Omega\text{-cm}^2$  for the membrane pair<sup>4</sup>,  $R_{soln} = 25 \Omega\text{-cm}^2$  considering HC solution is negligible, and  $A_G = 6.55 \text{ cm}^2$ , three additional membrane pairs ( $N_m = 2.4$ , rounded to the highest integer) in an MREC could be used mitigate the power loss due to the use of the additional LC cell. The addition of six membranes to overcome power loss due to resistance is

therefore substantial if the stack size is only a few membranes<sup>5</sup>, but relatively insignificant if a large RED stack of several hundred membrane pairs are used.

Power losses can also arise in a stack due to the formation of bubbles when AmB is used<sup>6</sup>. When bubbles form, the gas prevents liquid contact with the membrane, and thus the area for ion conduction of the membranes is reduced. Altering the chamber design can minimize bubble formation<sup>6</sup>. However, the ion exchange resin could introduce a greater number of pores for bubbles to form in and become lodged in the resin. This inclusion of bubbles in the resin chamber could increase internal resistance, and decrease the overall energy efficiency of the system.

Power is also lost in the pumping energy that is needed to pump solutions through and to and from the stack. Pumping losses within the stack have previously been studied in RED, and they were estimated to increase the power loss by 25% in larger systems<sup>7, 8</sup>. When resin is added to the LC chamber, additional pumping losses are introduced. The pressure drop due to the flow in a packed bed of resin can be estimated using the Kozeny-Carman equation and available data for pressure drop based on resin size. Large resin particles (smaller mesh) will have a smaller pressure drop, so larger resins are desirable from the perspective of energy losses due to pumping.

**Table S1.** Reactor Setups and Programs for Background Measurements

| Reactor Setup | Membranes | Test Use                                                                                              | BioLogic Program          |
|---------------|-----------|-------------------------------------------------------------------------------------------------------|---------------------------|
| HC   HC       | AEM       | Baseline                                                                                              | 0-4 mA, 0.5 mA steps/10 s |
| HC   HC   HC  | AEM       | Baseline                                                                                              | 0-4 mA, 0.5 mA steps/10 s |
| HC   LC   HC  | AEM       | Membrane resistance with dissimilar electrolytes.                                                     | 0-4 mA, 0.5 mA steps/10 s |
| HC   LC   HC  | CEM       | Membrane resistance with dissimilar electrolytes.<br>VMP3 program changed due to boundary conditions. | 0-4 mA, 0.5 mA steps/2 s  |

High concentration (HC) and low concentration (LC) chambers in 2C and 3C reactors are separated by membranes (|).

**Table S2.** Ion Exchange Resin Qualities

| Dowex Resin Name | Type   | Abbreviation | Ion Exchange Capacity (meq/L) | Cross-Linkage (%) | Moisture Content (%) |
|------------------|--------|--------------|-------------------------------|-------------------|----------------------|
| 1X2              | Anion  | AL           | 0.7                           | 2                 | 65-75                |
| 1X8              | Anion  | AH           | 1.2                           | 8                 | 43-48                |
| 50WX2            | Cation | CL           | 0.6                           | 2                 | 74-82                |
| 50WX8            | Cation | CH           | 1.7                           | 8                 | 50-58                |

Ion exchange capacity, cross-linkage, and moisture content data was gathered from Dowex technical bulletins <sup>9</sup>. The abbreviations indicate anion (A) or cation (C) exchange resin, as well as high IEC (H) or low IEC (L) properties.

**Table S3.** Membrane and Ion Exchange Resin Configurations for Resistance Tests

| Membranes | Membrane Type | Dowex Resin          | Resin Type | Mass Resin (g) |
|-----------|---------------|----------------------|------------|----------------|
| AEM-AEM   | A             | 1X8                  | AH         | 1, 2, 3        |
| AEM-AEM   | A             | 1X2                  | AL         | 3              |
| CEM-CEM   | C             | 50WX8                | CH         | 1, 2, 3        |
| CEM-CEM   | C             | 50WX2                | CL         | 3              |
| AEM-CEM   | A and C       | 50% 1X8<br>50% 50WX8 | AH and CH  | 1, 2, 3        |

The resin and membrane types indicate anion (A) or cation (C) exchange properties, as well as high IEC (H) or low IEC (L) resins.

**Table S4.** Comparison of TAN crossover and coulombs transferred after one cycle in MRECs and this study

| System                         | AmB Concentration (M)                          | Coulombs Transferred | Anode TAN (mg/L) | Reference                  |
|--------------------------------|------------------------------------------------|----------------------|------------------|----------------------------|
| MREC                           | 1.8                                            | 346                  | 590              | Cusick et al. <sup>5</sup> |
| MREC                           | 1.7                                            | 192                  | 789              |                            |
| MREC + LC<br>(0.023 M)         | 1.7 With 0.023 LC Chamber                      | 242                  | 311              | Luo et al. <sup>10</sup>   |
| MREC                           | 1.1                                            | 346                  | 741              |                            |
| MREC + LC<br>(0.011 M)         | 1.1 With 0.011 LC Chamber                      | 346                  | 40.6             | This study                 |
| MREC + LC<br>(0.011 M) + Resin | 1.1 With 0.011 LC Chamber<br>and 50% Dowex 1X8 | 346                  | 26.0             |                            |

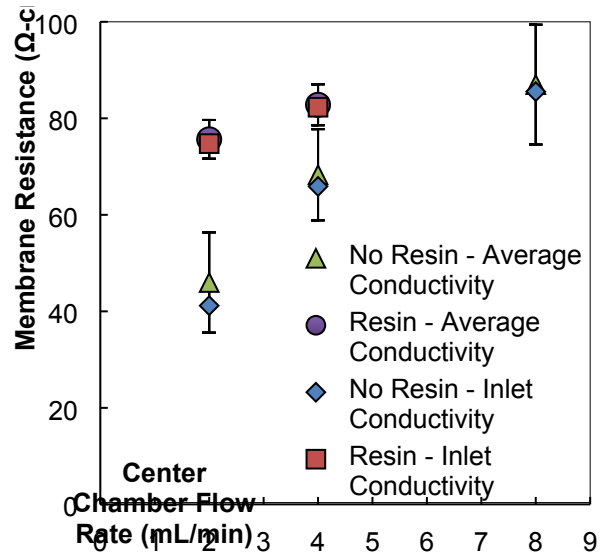

**Figure S1.** Calculated membrane resistance increases when using the average of the low concentration solution inlet and outlet conductivities.

## References

1. Vermaas, D. A.; Guler, E.; Saakes, M.; Nijmeijer, K., Theoretical power density from salinity gradients using reverse electrodialysis. *Energy Procedia* **2012**, *20*, 170-184.
2. Veerman, J.; Post, J.; Saakes, M.; Metz, S.; Harmsen, G., Reducing power losses caused by ionic shortcut currents in reverse electrodialysis stacks by a validated model. *J. Mem. Sci.* **2008**, *310*, 418-430.
3. Veerman, J.; de Jong, R. M.; Saakes, M.; Metz, S. J.; Harmsen, G. J., Reverse electrodialysis: Comparison of six commercial membrane pairs on the thermodynamic efficiency and power density. *J. Mem. Sci.* **2009**, *343*, 7-15.
4. Geise, G. M.; Curtis, A. J.; Hatzell, M. C.; Hickner, M. A.; Logan, B. E., Salt concentration differences alter membrane resistance in reverse electrodialysis stacks. *Environ. Sci. Technol. Lett.* **2013**, *1*, (1), 36-39.
5. Cusick, R. D.; Kim, Y.; Logan, B. E., Energy capture from thermolytic solutions in microbial reverse-electrodialysis cells. *Science* **2012**, *335*, 1474-1477.
6. Hatzell, M. C.; Logan, B. E., Evaluation of flow fields on bubble removal and system performance in an ammonium bicarbonate reverse electrodialysis stack. *J. Mem. Sci.* **2013**, *446*, (0), 449-455.
7. Kim, Y.; Logan, B. E., Microbial reverse electrodialysis cells for synergistically enhanced power production. *Environ. Sci. Technol.* **2011**, *45*, (13), 5834-5839.
8. Veerman, J.; Saakes, M.; Metz, S. J.; Harmsen, G., Reverse electrodialysis: Performance of a stack with 50 cells on the mixing of sea and river water. *J. Mem. Sci.* **2008**, *327*, 136-144.
9. Dowex resins technical information bulletin. In Sigma-Aldrich: Sigma-Aldrich, 2014; Vol. 2014.
10. Luo, X.; Nam, J.-Y.; Zhang, F.; Zhang, X.; Liang, P.; Huang, X.; Logan, B. E., Optimization of membrane stack configuration for efficient hydrogen production in microbial reverse-electrodialysis electrolysis cells coupled with thermolytic solutions. *Bioresour. Technol.* **2013**, *140*, 399-405.
